# Supplementary material for: Identification of Inappropriately Reprogrammed Genes by Large-Scale Transcriptome Analysis of Individual Cloned Mouse Blastocysts
Source: PubMed Central journal article supplement (PMC2894852; doi:10.1371/journal.pone.0011274), 2010-06-30
Supplement: pone.0011274.s001.pdf [file pone.0011274.s001.pdf]

|      | CON   | CUCB  | SRCB  | ESCB  |
|------|-------|-------|-------|-------|
| CON  | 14183 | 1150  | 1059  | 609   |
| CUCB | 13033 | 14183 | 1070  | 753   |
| SRCB | 13124 | 13113 | 14183 | 649   |
| ESCB | 13574 | 13430 | 13534 | 14183 |

Figure S1.
