# Supplementary material for: Identification of Inappropriately Reprogrammed Genes by Large-Scale Transcriptome Analysis of Individual Cloned Mouse Blastocysts
Source: PubMed Central journal article supplement (PMC2894852; doi:10.1371/journal.pone.0011274), 2010-06-30

Figure S2

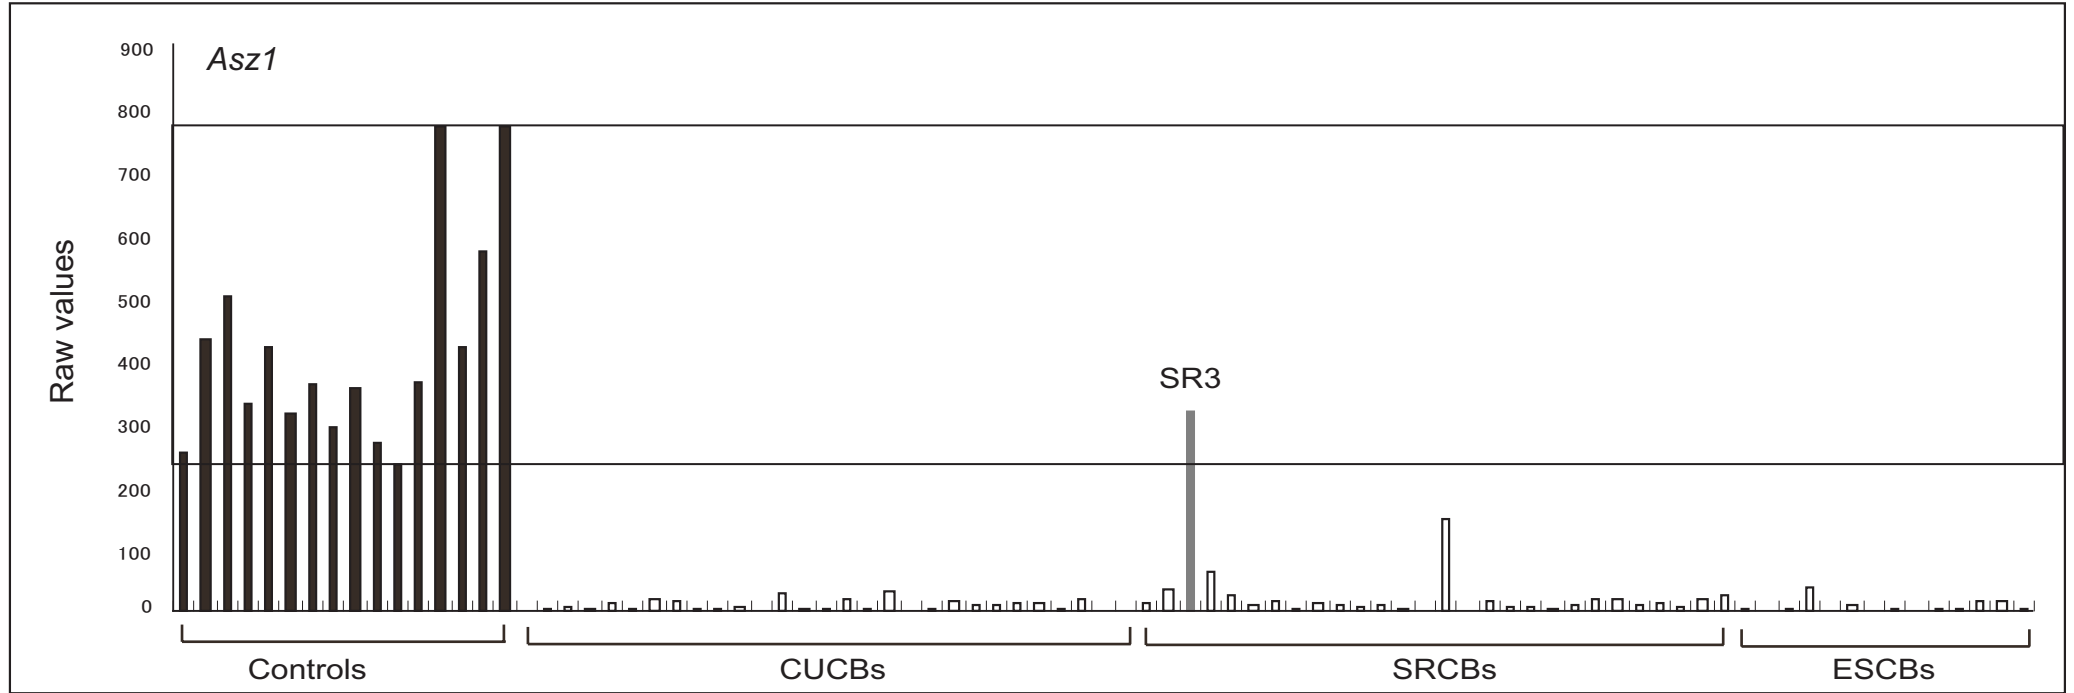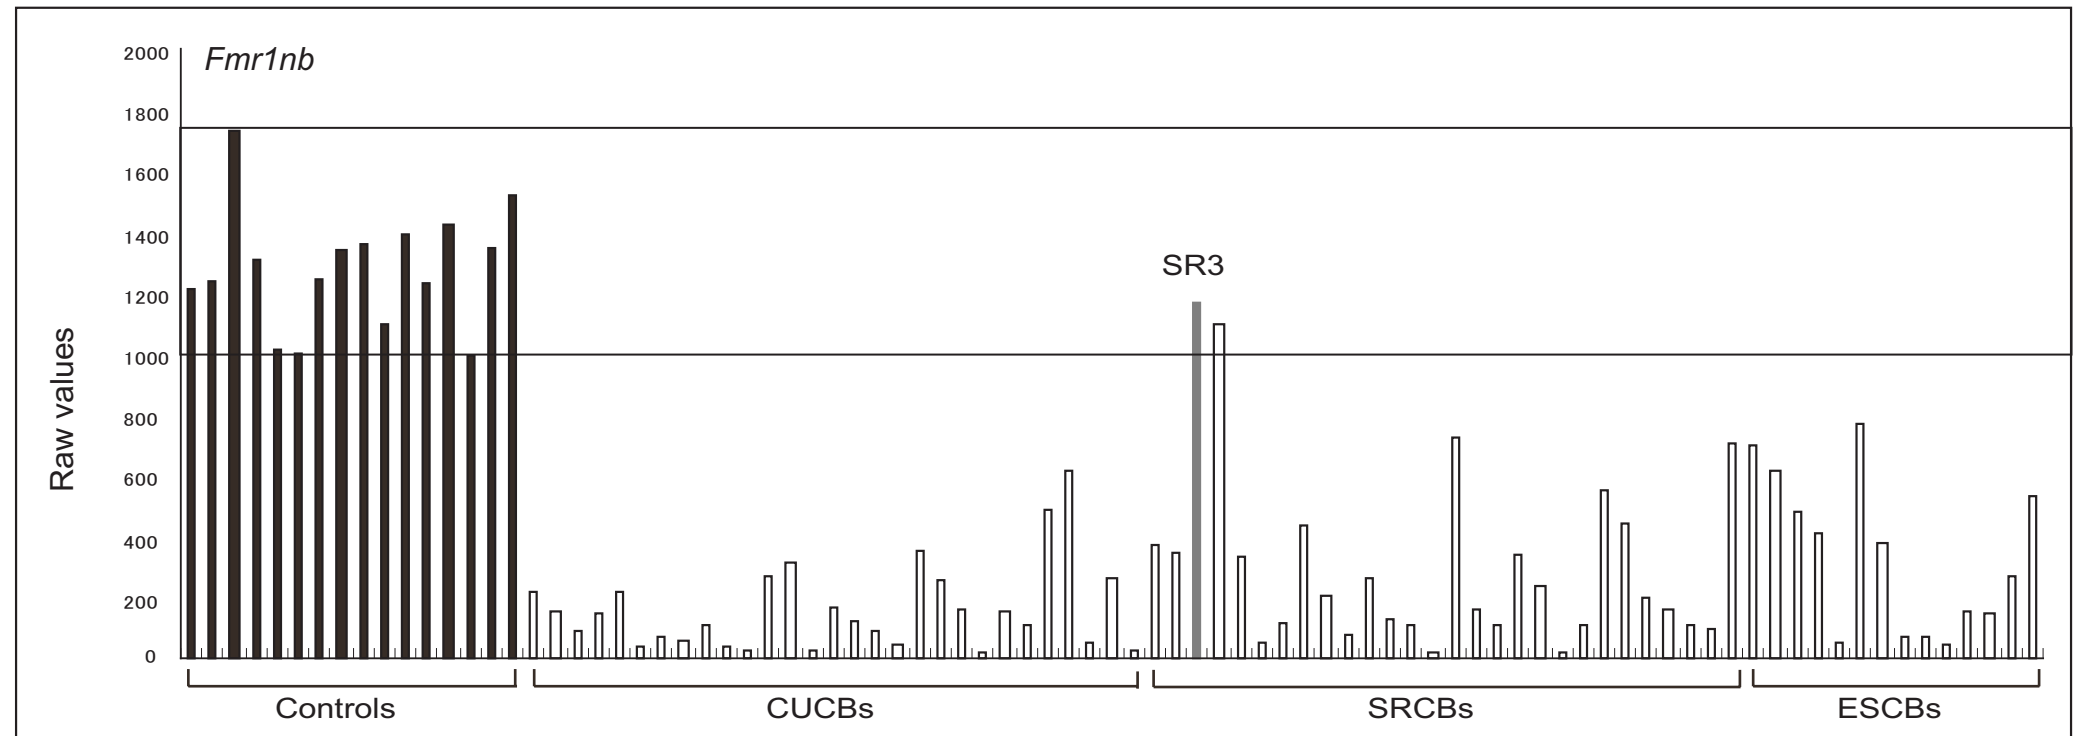

Supplement: pone.0011274.s002.pdf [file pone.0011274.s002.pdf]
