# Supplementary material for: Identification of Inappropriately Reprogrammed Genes by Large-Scale Transcriptome Analysis of Individual Cloned Mouse Blastocysts
Source: PubMed Central journal article supplement (PMC2894852; doi:10.1371/journal.pone.0011274), 2010-06-30
Supplement: pone.0011274.s005.pdf [file pone.0011274.s005.pdf]

**Supplemental Table S2. Descriptions of Canonical Pathways Constructed by Genes Differentially Expressed in Each cloned Group**

| Order | ALL                                                        | CU                                  | SR                                           | ES                                                         |
|-------|------------------------------------------------------------|-------------------------------------|----------------------------------------------|------------------------------------------------------------|
| 1     | Role of Oct4 in Mammalian Embryonic Stem Cell Pluripotency | Glycerophospholipid Metabolism      | Inositol Metabolism                          | RhoA Signaling                                             |
| 2     | Leukocyte Extravasation Signaling                          | Amyloid Processing                  | LXR/RXR Activation                           | Role of Oct4 in Mammalian Embryonic Stem Cell Pluripotency |
| 3     | p53 Signaling                                              | Wnt/ $\beta$ -catenin Signaling     | LPS/IL-1 Mediated Inhibition of RXR Function | NRF2-mediated Oxidative Stress Response                    |
| 4     | Nicotinate and Nicotinamide Metabolism                     | p53 Signaling                       | Arginine and Proline Metabolism              | Type I Diabetes Mellitus Signaling                         |
| 5     | Actin Cytoskeleton Signaling                               | Tight Junction Signaling            | Biosynthesis of Steroids                     | IL-9 Signaling                                             |
| 6     | Fructose and Mannose Metabolism                            | HER-2 Signaling in Breast Cancer    | RAR Activation                               | Huntington's Disease Signaling                             |
| 7     | G $\alpha$ 12/13 Signaling                                 | Pancreatic Adenocarcinoma Signaling | Aryl Hydrocarbon Receptor Signaling          | DNA Methylation and Transcriptional Repression Signaling   |
| 8     | Riboflavin Metabolism                                      | VDR/RXR Activation                  | NRF2-mediated Oxidative Stress               | IL-8 Signaling                                             |
| 9     | Human Embryonic Stem Cell                                  | Interferon Signaling                | Calcium Signaling                            | Type II Diabetes Mellitus Signaling                        |
| 10    | Methionine Metabolism                                      | Glioblastoma Multiforme Signaling   | Aminosugars Metabolism                       | Growth Hormone Signaling                                   |
