# Supplementary material for: Identification of Inappropriately Reprogrammed Genes by Large-Scale Transcriptome Analysis of Individual Cloned Mouse Blastocysts
Source: PubMed Central journal article supplement (PMC2894852; doi:10.1371/journal.pone.0011274), 2010-06-30
Supplement: pone.0011274.s006.pdf [file pone.0011274.s006.pdf]

Table S3. Differentially expressed genes involved in Top GO categories in each donor cell

| SR               | Probe ID     | [ES](raw) | [SR](raw) | [cu](raw)   | Gene Symbol    |                  | Probe ID     | [ES](raw) | [SR](raw) | [cu](raw) | Gene Symbol          |
|------------------|--------------|-----------|-----------|-------------|----------------|------------------|--------------|-----------|-----------|-----------|----------------------|
| GO:0016126       | 1423078_a_at | 828.8015  | 195.1738  | 979.4833    | <i>Sc4mol</i>  |                  | 1453196_a_at | 1.482793  | 18.78687  | 256.1661  | <i>Oasl2</i>         |
|                  | 1451457_at   | 208.82298 | 36.02563  | 403.3878    | <i>Sc5d</i>    |                  | 1418736_at   | 68.93503  | 421.559   | 1947.589  | <i>B3galnt1</i>      |
|                  | 1460684_at   | 162.2543  | 58.25155  | 263.8276    | <i>Tm7sf2</i>  |                  | 1460204_at   | 8.447554  | 32.86328  | 165.0034  | <i>Tec</i>           |
| ES<br>GO:0050789 | 1420086_x_at | 862.50916 | 2.546473  | 5.807298    | <i>Fgf4</i>    | CU<br>GO:0016740 | 1452677_at   | 8.584272  | 5.971514  | 162.2675  | <i>Pnpt1</i>         |
|                  | 1416967_at   | 2277.4438 | 9.342986  | 1.119108    | <i>Sox2</i>    |                  | 1449630_s_at | 35.62468  | 59.99294  | 604.5212  | <i>Mark1</i>         |
|                  | 1460682_s_at | 218.20578 | 2.87745   | 9.639275    | <i>Ceacam1</i> |                  | 1448183_a_at | 28.73729  | 40.12304  | 229.875   | <i>Hif1a</i>         |
|                  | 1418133_at   | 424.62677 | 15.12946  | 135.2874    | <i>Bcl3</i>    |                  | 1419497_at   | 30.50979  | 22.68534  | 189.8535  | <i>Cdkn1b</i>        |
|                  | 1449592_at   | 1031.7913 | 39.1582   | 20.26274    | <i>Tcf15</i>   |                  | 1457046_s_at | 31.27565  | 47.56513  | 159.0824  | <i>C77370</i>        |
|                  | 1450016_at   | 1257.0916 | 84.48518  | 94.05072    | <i>Ccng1</i>   |                  | 1434061_at   | 62.68763  | 64.57081  | 212.9743  | <i>Rp2h</i>          |
|                  | 1422912_at   | 645.9807  | 48.86761  | 32.15035    | <i>Bmp4</i>    |                  | 1424638_at   | 1175.811  | 96.04173  | 3695.901  | <i>Cdkn1a</i>        |
|                  | 1419018_at   | 105.98193 | 10.87192  | 9.153988    | <i>Rhox6</i>   |                  | 1417649_at   | 79.82433  | 142.7979  | 7.506853  | <i>Cdkn1c</i>        |
|                  | 1456225_x_at | 467.22113 | 52.29669  | 47.49166    | <i>Trib3</i>   |                  | 1449534_at   | 337.2136  | 133.6844  | 28.69917  | <i>Sycp3</i>         |
|                  | 1424153_s_at | 176.4549  | 24.58283  | 1.844095    | <i>Sall4</i>   |                  | 1420064_s_at | 12.89178  | 182.8024  | 1         | <i>Tkt1</i>          |
|                  | 1448181_at   | 177.06918 | 31.06385  | 14.48437    | <i>Klf15</i>   |                  | 1454138_a_at | 114.8099  | 96.15283  | 5.625514  | <i>Stk31</i>         |
|                  | 1448595_a_at | 11947.025 | 2325.285  | 3470.482    | <i>Bex1</i>    |                  | 1456208_at   | 44.96681  | 181.6074  | 1         | <i>A530057A03Rik</i> |
|                  | 1415956_a_at | 33.678837 | 128.1357  | 220.5989    | <i>Pctk1</i>   |                  | 1434399_at   | 560.1644  | 34.75673  | 5.141852  | <i>Galnt6</i>        |
|                  | 1449507_a_at | 24.303322 | 93.32291  | 1159.545    | <i>Cd47</i>    |                  | 1430781_at   | 384.1679  | 73.43939  | 3.004887  | <i>Ak7</i>           |
|                  | 1418285_at   | 12.866414 | 110.7327  | 64.43767    | <i>Efnb1</i>   |                  |              |           |           |           |                      |
|                  | 1420621_a_at | 10.073851 | 273.2508  | 468.4097    | <i>App</i>     |                  |              |           |           |           |                      |
|                  | 1426397_at   | 46.449646 | 436.8082  | 406.4336    | <i>Tgfb2</i>   |                  |              |           |           |           |                      |
|                  | 1450782_at   | 2.2248955 | 64.01466  | 2235.137    | <i>Wnt4</i>    |                  |              |           |           |           |                      |
| 1452670_at       | 11.661102    | 368.4554  | 42.17836  | <i>My19</i> |                |                  |              |           |           |           |                      |
