# Supplementary material for: Identification of Inappropriately Reprogrammed Genes by Large-Scale Transcriptome Analysis of Individual Cloned Mouse Blastocysts
Source: PubMed Central journal article supplement (PMC2894852; doi:10.1371/journal.pone.0011274), 2010-06-30
Supplement: pone.0011274.s008.pdf [file pone.0011274.s008.pdf]

**Supplemental Table S5. Expression Report of Present Probe Sets**

| Sample Name | Number of present probe sets | P%    | Sample Name | Number of present probe sets | P%    |
|-------------|------------------------------|-------|-------------|------------------------------|-------|
| Con1        | 17969                        | 39.8% | SR1         | 19900                        | 44.1% |
| Con2        | 19857                        | 44.0% | SR2         | 20319                        | 45.1% |
| Con3        | 19552                        | 43.4% | SR3         | 18640                        | 41.3% |
| Con4        | 19732                        | 43.8% | SR4         | 19343                        | 42.9% |
| Con5        | 18558                        | 41.1% | SR5         | 19172                        | 42.5% |
| Con6        | 19033                        | 42.2% | SR6         | 19462                        | 43.2% |
| Con7        | 18691                        | 41.4% | SR8         | 18999                        | 42.1% |
| Con8        | 18598                        | 41.2% | SR9         | 18945                        | 42.0% |
| Con9        | 18481                        | 41.0% | SR10        | 19030                        | 42.2% |
| Con10       | 19052                        | 42.2% | SR11        | 18685                        | 41.4% |
| Con11       | 19274                        | 42.7% | SR12        | 19803                        | 43.9% |
| Con12       | 19050                        | 42.2% | SR13        | 18471                        | 41.0% |
| Con13       | 18413                        | 40.8% | SR14        | 19529                        | 43.3% |
| Con14       | 18648                        | 41.3% | SR15        | 18842                        | 41.8% |
| Con15       | 18396                        | 40.8% | SR16        | 20354                        | 45.1% |
| Con16       | 18019                        | 40.0% | SR17        | 19856                        | 44.0% |
|             |                              |       | SR18        | 19010                        | 42.1% |
| cu1         | 19154                        | 42.5% | SR19        | 20065                        | 44.5% |
| cu2         | 17507                        | 38.8% | SR20        | 19116                        | 42.4% |
| cu3         | 17775                        | 39.4% | SR21        | 18184                        | 40.3% |
| cu4         | 16905                        | 37.5% | SR22        | 18128                        | 40.2% |
| cu5         | 18597                        | 41.2% | SR23        | 19612                        | 43.5% |
| cu6         | 17738                        | 39.3% | SR25        | 20426                        | 45.3% |
| cu7         | 18074                        | 40.1% | SR26        | 19840                        | 44.0% |
| cu8         | 18548                        | 41.1% | SR27        | 19833                        | 44.0% |
| cu9         | 18342                        | 40.7% | SR28        | 19526                        | 43.3% |
| cu10        | 18107                        | 40.1% | SR29        | 19306                        | 42.8% |
| cu11        | 17438                        | 38.7% | SR30        | 19738                        | 43.8% |
| cu12        | 18363                        | 40.7% |             |                              |       |
| cu13        | 19867                        | 44.1% | ES1         | 19668                        | 43.6% |
| cu14        | 18142                        | 40.2% | ES2         | 19533                        | 43.3% |
| cu15        | 18755                        | 41.6% | ES3         | 18700                        | 41.5% |
| cu16        | 18517                        | 41.1% | ES4         | 18881                        | 41.9% |
| cu17        | 17631                        | 39.1% | ES5         | 17039                        | 37.8% |
| cu18        | 18881                        | 41.9% | ES6         | 18864                        | 41.8% |
| cu19        | 19531                        | 43.3% | ES7         | 17978                        | 39.9% |
| cu20        | 18186                        | 40.3% | ES8         | 15362                        | 34.1% |
| cu21        | 18743                        | 41.6% | ES9         | 15819                        | 35.1% |
| cu22        | 18814                        | 41.7% | ES10        | 18014                        | 39.9% |
| cu23        | 19216                        | 42.6% | ES11        | 17403                        | 38.6% |
| cu24        | 19716                        | 43.7% | ES12        | 17486                        | 38.8% |
| cu25        | 18241                        | 40.4% | ES13        | 15905                        | 35.3% |
| cu26        | 18350                        | 40.7% | ES14        | 18245                        | 40.5% |
| cu27        | 15884                        | 35.2% |             |                              |       |
| cu28        | 17327                        | 38.4% |             |                              |       |
| cu29        | 15440                        | 34.2% |             |                              |       |
