# Supplementary material for: Identification of Inappropriately Reprogrammed Genes by Large-Scale Transcriptome Analysis of Individual Cloned Mouse Blastocysts
Source: PubMed Central journal article supplement (PMC2894852; doi:10.1371/journal.pone.0011274), 2010-06-30
Supplement: pone.0011274.s009.pdf [file pone.0011274.s009.pdf]

**Supplemental Table S6. The Signal (3'/5') Ratio of *Gapdh* and  $\beta$ -action**

| SampleName | b-Actin   | Gapdh     | SampleName | b-Actin    | Gapdh      |
|------------|-----------|-----------|------------|------------|------------|
| con1       | 8.7778425 | 10.611547 | SR1        | 5.74091    | 8.9943905  |
| con2       | 11.154052 | 9.604611  | SR2        | 6.260167   | 9.734713   |
| con3       | 7.112683  | 6.595523  | SR3        | 10.961718  | 10.421484  |
| con4       | 7.1224737 | 6.0176535 | SR4        | 7.241521   | 9.326849   |
| con5       | 12.876966 | 10.608603 | SR5        | 7.823145   | 12.173708  |
| con6       | 14.702988 | 13.06701  | SR6        | 5.9829707  | 6.6760583  |
| con7       | 9.311048  | 10.696405 | SR7        | 4.7655406  | 6.639841   |
| con8       | 13.089081 | 11.860206 | SR8        | 5.8558097  | 8.982151   |
| con9       | 12.115263 | 11.000553 | SR9        | 5.6267014  | 9.320656   |
| con10      | 18.333908 | 14.30989  | SR10       | 10.691717  | 10.847345  |
| con11      | 8.154123  | 9.239252  | SR11       | 9.667199   | 10.355107  |
| con12      | 20.455608 | 14.812883 | SR12       | 6.108022   | 8.775463   |
| con13      | 18.995544 | 14.553926 | SR13       | 5.5074363  | 9.107455   |
| con14      | 24.684868 | 14.486279 | SR14       | 11.137437  | 12.850852  |
| con15      | 20.121258 | 12.670944 | SR15       | 10.224532  | 15.858984  |
| con16      | 23.400581 | 17.837132 | SR16       | 13.3229685 | 15.651627  |
| CU1        | 6.6358304 | 7.296317  | SR17       | 37.287918  | 24.456747  |
| CU2        | 12.510183 | 9.825655  | SR18       | 8.302281   | 16.496786  |
| CU3        | 45.889862 | 24.469658 | SR19       | 11.088065  | 16.358723  |
| CU4        | 33.48241  | 25.854631 | SR20       | 17.52505   | 16.128714  |
| CU5        | 37.946888 | 21.266758 | SR21       | 18.5566    | 18.24634   |
| CU6        | 58.406063 | 17.129503 | SR22       | 11.509092  | 16.033415  |
| CU7        | 43.82546  | 20.106842 | SR23       | 5.6966233  | 9.999477   |
| CU8        | 17.231285 | 27.845434 | SR24       | 9.402284   | 13.349768  |
| CU9        | 44.239296 | 16.90543  | SR25       | 7.071502   | 13.609827  |
| CU10       | 32.02931  | 22.125189 | SR26       | 14.410664  | 16.575293  |
| CU11       | 40.862186 | 23.263882 | SR27       | 9.994475   | 13.303906  |
| CU12       | 3.4925234 | 5.084405  | SR28       | 13.468313  | 14.6378975 |
| CU13       | 2.0941882 | 4.652903  | ES1        | 12.5308    | 14.018179  |
| CU14       | 7.1058683 | 9.756647  | ES2        | 18.518232  | 15.904053  |
| CU15       | 7.744314  | 8.558278  | ES3        | 12.341846  | 11.972003  |
| CU16       | 3.5951269 | 5.9168906 | ES4        | 18.105955  | 13.055182  |
| CU17       | 6.04176   | 7.8505435 | ES5        | 26.738323  | 12.909072  |
| CU18       | 7.106329  | 9.087855  | ES6        | 10.206712  | 8.402463   |
| CU19       | 5.5554314 | 7.377319  | ES7        | 12.629768  | 11.23893   |
| CU20       | 15.486058 | 8.069583  | ES8        | 27.15956   | 9.731752   |
| CU21       | 12.462277 | 7.6880894 | ES9        | 35.249622  | 13.344854  |
| CU22       | 6.992665  | 10.029293 | ES10       | 13.421406  | 12.280153  |
| CU23       | 8.560683  | 7.991734  | ES11       | 23.40748   | 12.867997  |
| CU24       | 4.0602574 | 7.177688  | ES12       | 16.273634  | 11.334031  |
| CU25       | 8.699794  | 9.08098   | ES13       | 20.406864  | 7.928024   |
| CU26       | 4.7197247 | 7.23663   | ES14       | 10.209525  | 9.060492   |
| CU27       | 26.610083 | 9.179198  |            |            |            |
| CU28       | 16.604254 | 9.109906  |            |            |            |
| CU29       | 24.00529  | 10.939458 |            |            |            |
