# Supplementary material for: Identification of Inappropriately Reprogrammed Genes by Large-Scale Transcriptome Analysis of Individual Cloned Mouse Blastocysts
Source: PubMed Central journal article supplement (PMC2894852; doi:10.1371/journal.pone.0011274), 2010-06-30
Supplement: pone.0011274.s010.pdf [file pone.0011274.s010.pdf]

## Supplemental Table S7. Primer/Probe Sequence Used for Mq-PCR.

| Gene Na        | forward                     | reverse                    | probe                                             |
|----------------|-----------------------------|----------------------------|---------------------------------------------------|
| <i>Tm7sf2</i>  | TAGCTTGGGTACCATTCACCTACA    | TAACCAATAGCCTTAAGGAGGCAGAT | /56-TAMN/AGTTCCTGTTGTACCATCCACAGCCTCT/3IAbRQSp/   |
| <i>Pgk1</i>    | ATGAGATGATCATTGGTGGTGGAAAT  | TGACAAAGTCAACAGGCAAGGTAAT  | /5TEX615/AAGGTGCTCAACAACATGGAGATTGGCA/3IAbRQSp/   |
| <i>Fmr1nb</i>  | TTCAGTAAGCCAGTGTCTGCAATA    | AGCTTCAGCAAGAATGGGCAATTT   | /5HEX/TTATTCTGGACGCTGGTGATCCTGTTCCGT/3IAb1kFQ/    |
| <i>Mageb16</i> | AGAGCATGCTGATTCAAGTTCTACT   | ATACAGAAGGAACTGATCTCTGACT  | /56-TAMN/TAGTGACACAAGCAGCAACTTCTCTCAGGT/3IAbRQSp/ |
| <i>Asz1</i>    | AAATGACCCAACTCATATCCCCTACTA | TGCAAAGTTAGCTTGCCGATGAAA   | /56-FAM/TGAAGAGGTCAGCAGTTACAGTGTGTGGAT/3IAb1kFQ/  |
| <i>Pls3</i>    | TTGGTCCGATACATGCTTGTGTTGTT  | ATTTCTGAGACCACATCTCCTTGT   | /56-TAMN/AGGGTGGGCTCAGAATTTAGACGGGAATTT/3IAbRQSp/ |
| <i>Abcg2</i>   | TCCTGGCTTCAGTACTTTAGCATT    | AAGTGCTGTTGTCCGTTACATTGAA  | /5HEX/CCTCGATATGGCTTCACAGCTTTGCAGT/3IAb1kFQ/      |
| <i>Msn</i>     | AGTTGAAATGGCTCGAAAGAAGAA    | TCTCATCCTGCTCATCATGTTTCATT | /56-FAM/AAAGTGAGGCTGTGGAATGGCAGCAAA/3IAb1kFQ/     |
| <i>App</i>     | AACTGGTGTCTTTGCTGAAGATGT    | ATGACAATCACGGTTGCTATGACA   | /56-TAMN/AACAAAGGCGCCATCATCGGACTCAT/3IAbRQSp/     |
| <i>Xlr3a</i>   | TCGCAATTACTGGTTAGCACACATT   | AGCAGAATGTCAAAGAAAGCCTGTA  | /56-FAM/AATTGGAAGGCACACAAGTGGGCTATTGTT/3IAb1kFQ/  |
| <i>Actin</i>   | GAAATCGTGCGTGACATCAAAG      | CTGTGGCATCCATGAAACTACA     | /5Cy5/AGGTCATCACTATTGGCAACGAGCGGTT/3IAbRQSp/      |
