# Supplementary material for: Identification of Inappropriately Reprogrammed Genes by Large-Scale Transcriptome Analysis of Individual Cloned Mouse Blastocysts
Source: PLoS One. 2010 Jun 30;5(6):e11274. doi: 10.1371/journal.pone.0011274 (PMC2894852; doi:10.1371/journal.pone.0011274)
Supplement: Table S1 — (0.01 MB PDF) [file pone.0011274.s004.pdf]

**Supplemental Table S1. Developmental Ability of Embryos cloned from Sertoli cells**

| No. of activated<br>cloned embryos | No. of 2-cell<br>embryos | No. of morulae<br>and blastocysts | No. of embryos<br>transferred (ET) | No. of<br>implantation sites | No. of pups<br>(%: Pups / ET) |
|------------------------------------|--------------------------|-----------------------------------|------------------------------------|------------------------------|-------------------------------|
| 774                                | 523                      | 449                               | 330                                | 126                          | 14(4.2)                       |
